# Supplementary material for: MoS2–MoP heterostructured nanosheets on polymer-derived carbon as an electrocatalyst for hydrogen evolution reaction
Source: Royal Society of Chemistry journal article supplement (doi:10.1039/c7ta09307a), 2017-11-30
Supplement: c7ta09307a1.pdf [file c7ta09307a1.pdf]

## Supporting Information

### **MoS<sub>2</sub>-MoP Heterostructured Nanosheets Supported on Polymer-Derived Carbon for Hydrogen Evolution Reaction**

Zexing Wu<sup>a,b</sup>, Jie Wang<sup>c</sup>, Kedong Xia<sup>a</sup>, Wen Lei<sup>a</sup>, Xien Liu<sup>b</sup> and Deli Wang<sup>a\*</sup>

(a) Key Laboratory of Material Chemistry for Energy Conversion and Storage (Huazhong University of Science and Technology), Ministry of Education, Hubei Key Laboratory of Material Chemistry and Service Failure, School of Chemistry and Chemical Engineering, Huazhong University of Science and Technology, Wuhan, 430074, P.R. China.

(b) Key Laboratory of Sensor Analysis of Tumor Marker of Education Ministry, State Key Laboratory Base of Eco-chemical Engineering, College of Chemistry and Molecular Engineering, Qingdao University of Science & Technology, Qingdao 266042, P. R. China

(c) Department of Applied Physics, The Hong Kong Polytechnic University, Hung Horn, Kowloon, Hong Kong.

\*Corresponding author: E-mail: wangdl81125@hust.edu.cn.

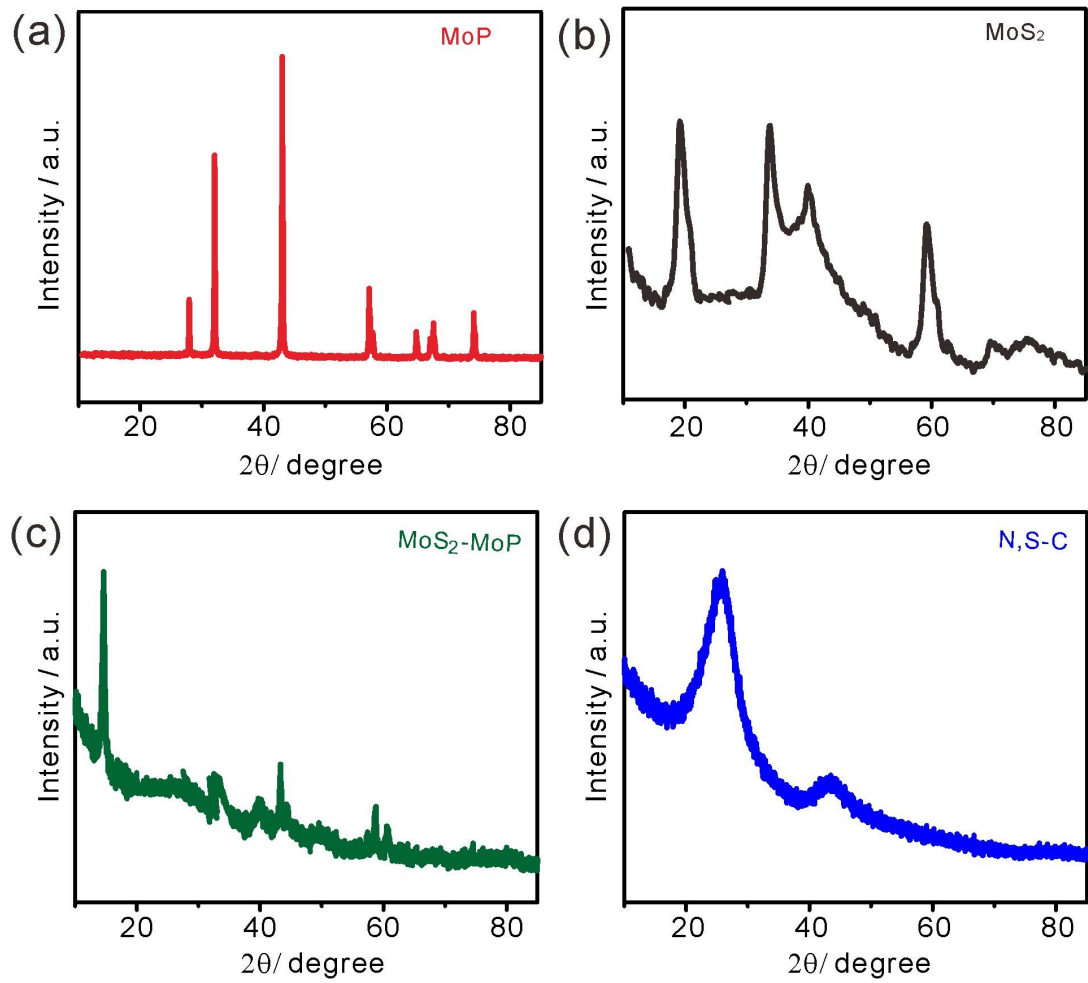

**Fig. S1.** XRD pattern of bulk MoP (a), MoS<sub>2</sub> (b), MoS<sub>2</sub>-MoP (c) and NS-C (d).

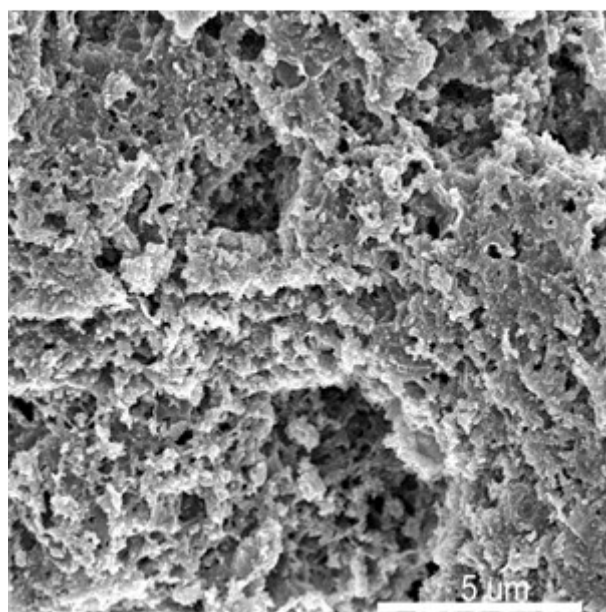

**Fig. S2.** SEM image of heteroatoms doped carbon supported MoS<sub>2</sub>-MoP nanosheets.

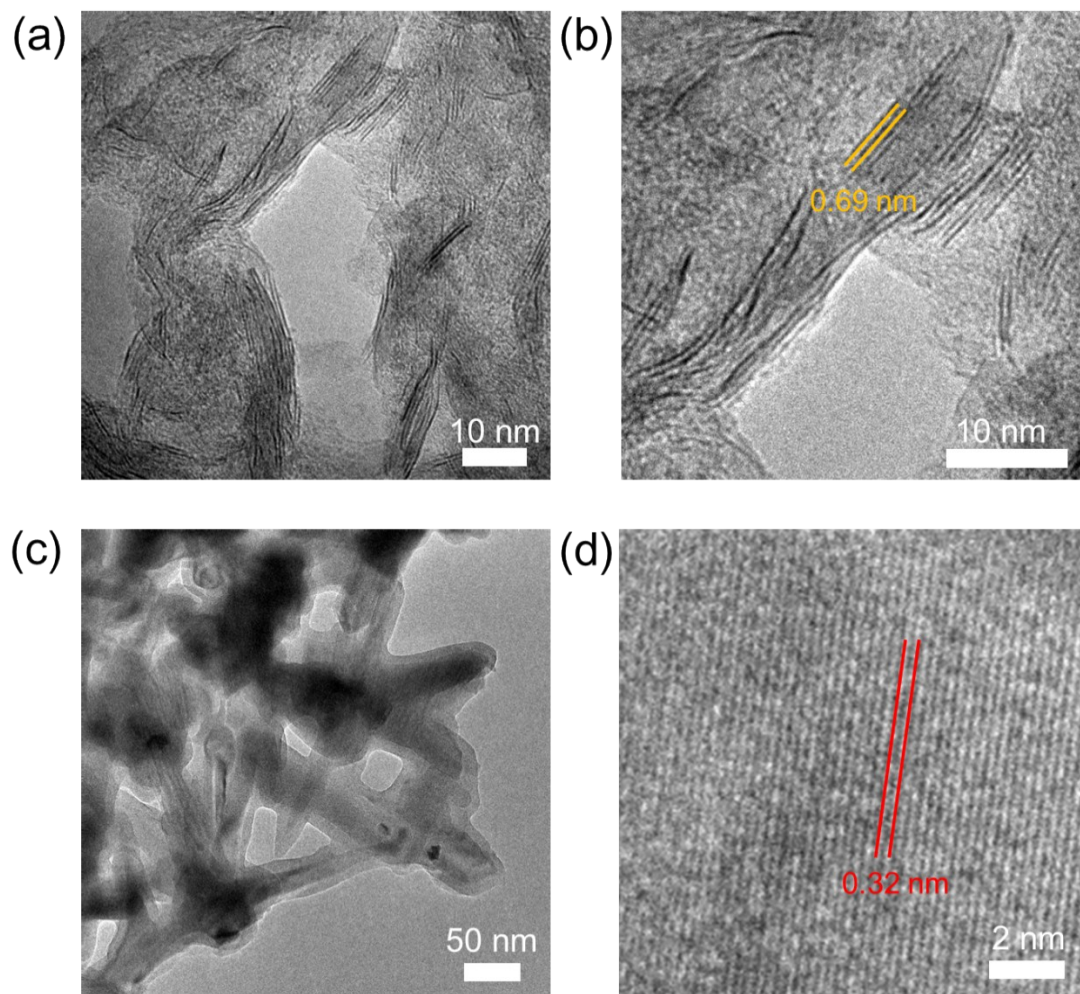

**Fig. S3.** TEM image of MoS<sub>2</sub>/C (a, b) and MoP/C (c, d) and its corresponding HR-TEM images.

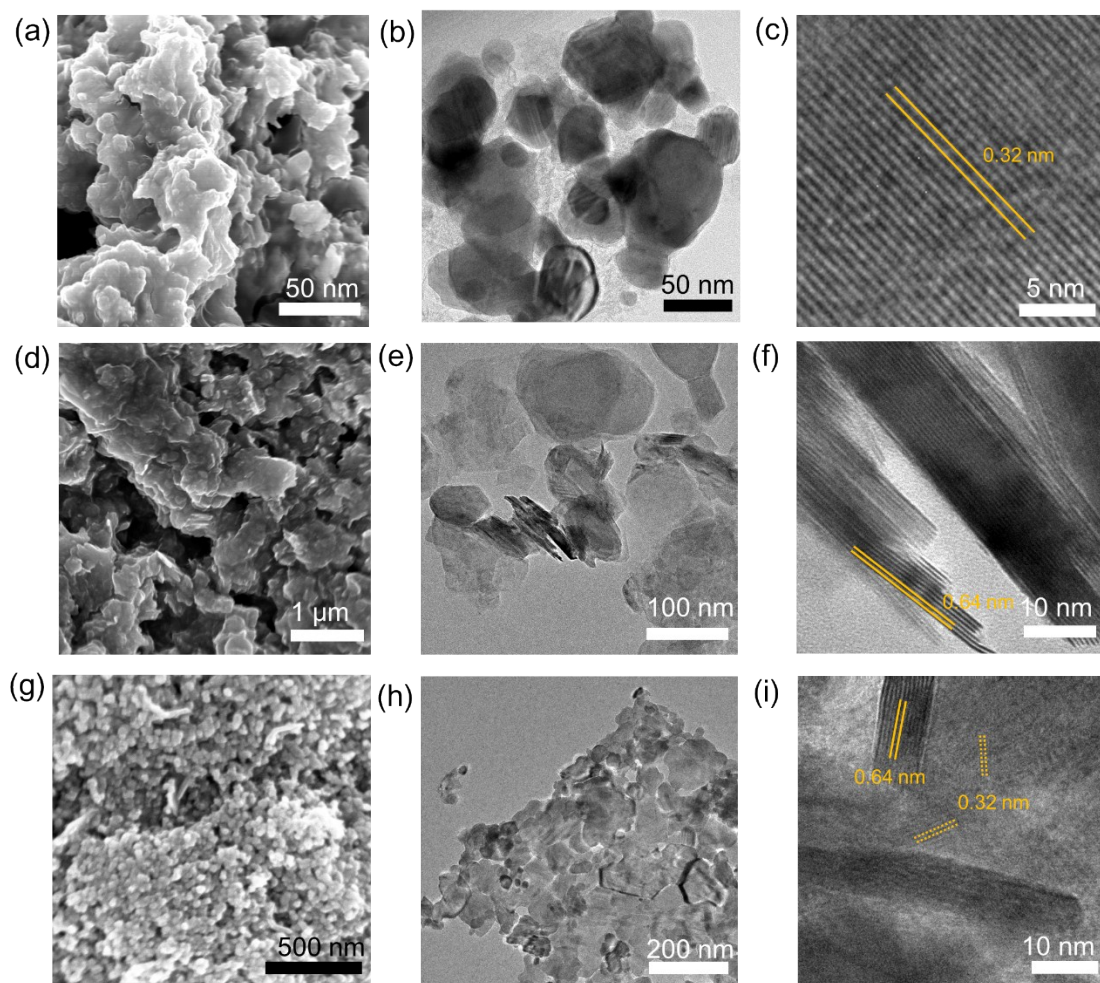

**Fig. S4** SEM and TEM images of MoP (a-c), MoS<sub>2</sub> (d-f) and MoS<sub>2</sub>-MoP (g-i).

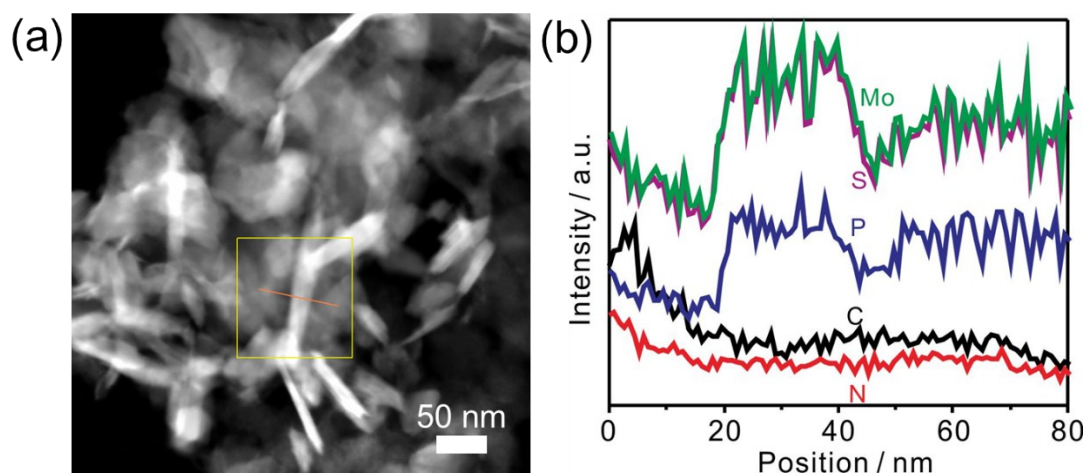

**Figure S5** STEM images (a) and the line-scan EDX spectra for a cross section of MoS<sub>2</sub>-MoP/C nanosheet in (b).

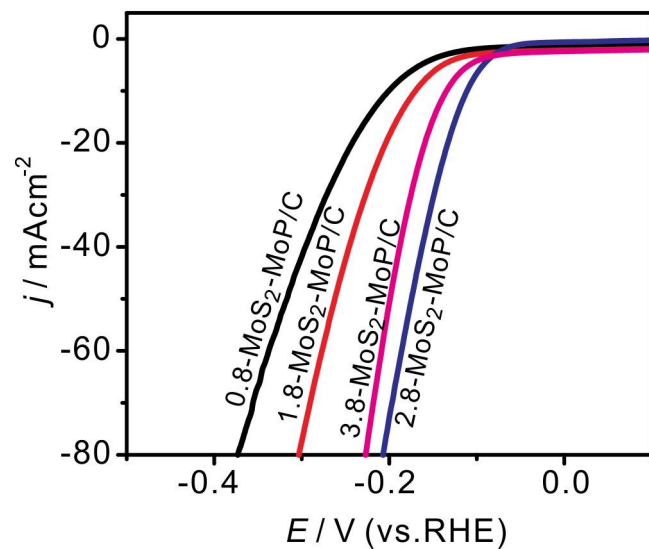

**Fig. S6** Polarization curves of MoS<sub>2</sub>-MoP/C with various amount of NaH<sub>2</sub>PO<sub>4</sub>.

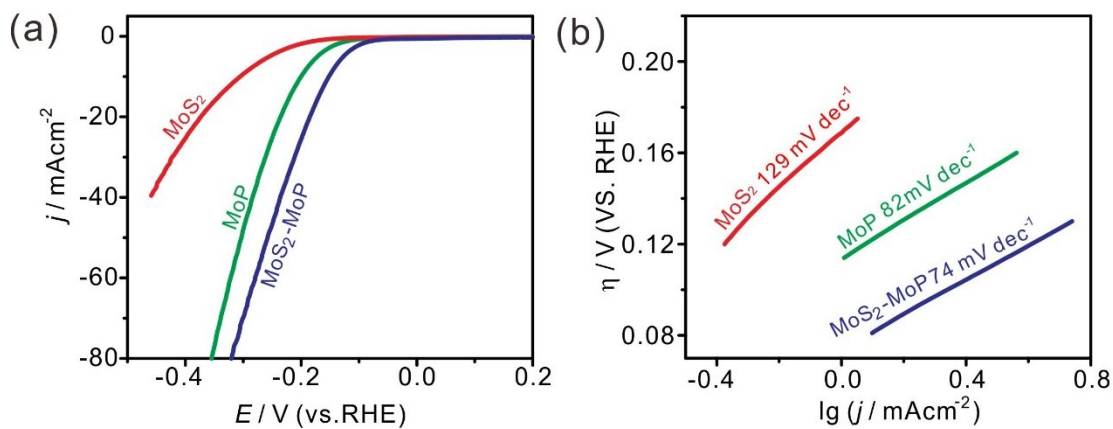

**Fig. S7** Polarization curves (a) and corresponding Tafel slopes (b) of MoS<sub>2</sub>-MoP, MoP and MoS<sub>2</sub> in 0.5 M H<sub>2</sub>SO<sub>4</sub> solution at a scan rate of 5 mV s<sup>-1</sup>.

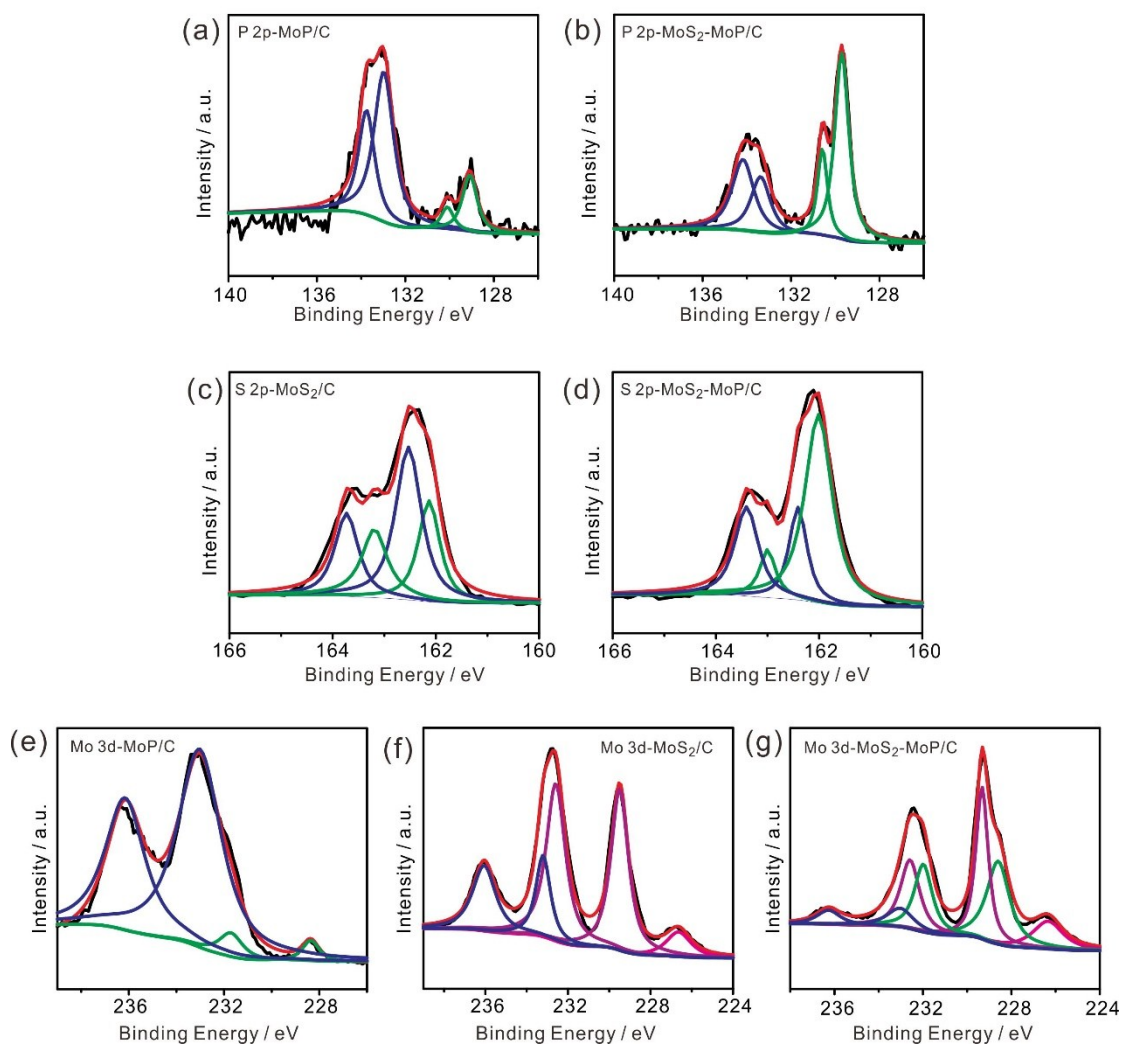

**Fig. S8** High resolution of P 2p in MoP/C (a) and MoS<sub>2</sub>-MoP/C (b). High resolution of S 2p in MoS<sub>2</sub>/C (c) and MoS<sub>2</sub>-MoP/C (d). High resolution of Mo 3d in MoP/C (e), MoS<sub>2</sub>/C (f) and MoS<sub>2</sub>-MoP/C (g).

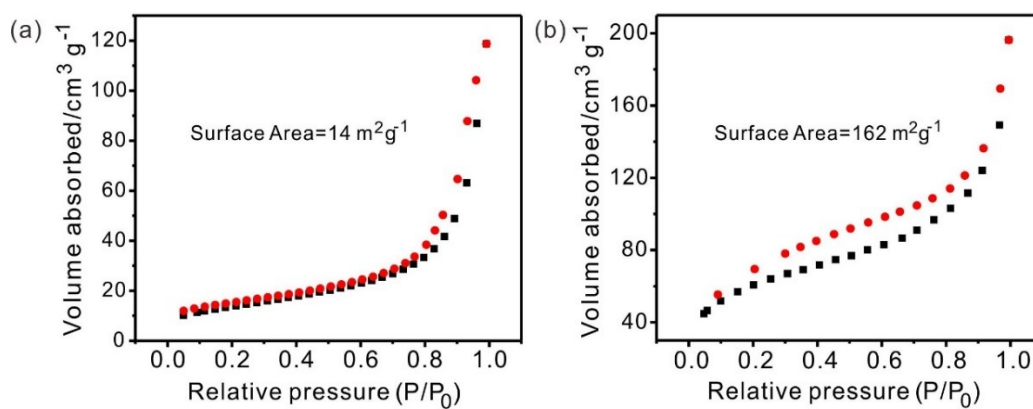

**Fig. S9** Nitrogen adsorption/desorption isotherms of MoS<sub>2</sub>-MoP (a) and MoS<sub>2</sub>-MoP/C

(b).

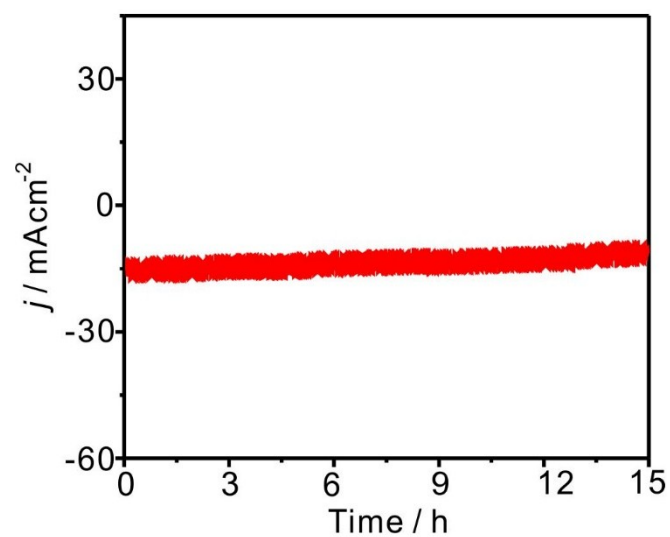

**Fig. S10** Stability test of MoS<sub>2</sub>-MoP/C in 0.5 M H<sub>2</sub>SO<sub>4</sub> at an overpotential of 124 mV.

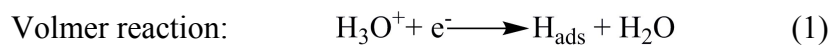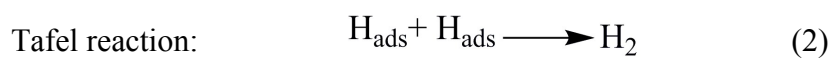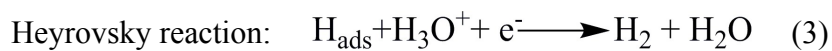

**Table S1.** Comparison of the HER performance of some reported catalysts.

| Samples                                  | $\eta_{j=10 \text{ mA cm}^{-2}}$<br>(V vs.RHE) | Tafel slopes<br>(mV dec <sup>-1</sup> ) | Loading<br>( $\mu\text{g cm}^{-2}$ ) |
|------------------------------------------|------------------------------------------------|-----------------------------------------|--------------------------------------|
| MoS <sub>2</sub> ⊥ RGO[1]                | 0.172                                          | 43                                      | 204                                  |
| MoS <sub>2</sub><br>nanoparticles/RGO[2] | 0.155                                          | 41                                      | 285                                  |
| MoS <sub>2</sub> nanosheets/RGO[3]       | 0.18                                           | 41                                      | 200                                  |
| MoS <sub>2</sub> nanosheets/RGO[4]       | ~0.21                                          | 46                                      | 220                                  |
| MoS <sub>2</sub> QDs[5]                  | 0.3                                            | 59                                      | -                                    |
| MoS <sub>2</sub> @S-C [6]                | 0.16                                           | 72                                      | -                                    |
| MoS <sub>2</sub> NFs/rGO [7]             | ~0.32                                          | 95                                      | 116                                  |
| MoP [8]                                  | 0.14                                           | 54                                      | 860                                  |
| MoP [9]                                  | 0.25                                           | 60                                      | 71                                   |
| MoP/S [10]                               | 0.12                                           | 50                                      | 1000                                 |
| MoP [11]                                 | 0.13                                           | 54                                      | 360                                  |
| MoP/Carbon [12]                          | 0.2                                            | 56                                      | 360                                  |
| Amorphous MoP [13]                       | 0.11                                           | -                                       | 1000                                 |
| MoS <sub>2</sub> -MoP/C(This work)       | 0.102                                          | 58                                      | 420                                  |



## References

1. Deng Z H, Li L, Ding W, et al. Synthesized ultrathin MoS<sub>2</sub> nanosheets perpendicular to graphene for catalysis of hydrogen evolution reaction. *Chem. Commun.*, 2015, 51(10): 1893-1896.
2. Li Y, Wang H, Xie L, et al. MoS<sub>2</sub> nanoparticles grown on graphene: an advanced catalyst for the hydrogen evolution reaction. *J. Am. Chem. Soc.*, 2011, 133(19): 7296-7299.
3. Zheng X, Xu J, Yan K, et al. Space-confined growth of MoS<sub>2</sub> nanosheets within graphite: The layered hybrid of MoS<sub>2</sub> and graphene as an active catalyst for hydrogen evolution reaction. *Chem. Mater.*, 2014, 26(7): 2344-2353.
4. Zhou W, Zhou K, Hou D, et al. Three-Dimensional Hierarchical Frameworks Based on MoS<sub>2</sub> Nanosheets Self-Assembled on Graphene Oxide for Efficient Electrocatalytic Hydrogen Evolution. *ACS Appl. Mater. Interfaces*, 2014, 6(23): 21534-21540.
5. Ren X, Pang L, Zhang Y, et al. One-step hydrothermal synthesis of monolayer MoS<sub>2</sub> quantum dots for highly efficient electrocatalytic hydrogen evolution. *J. Mater. Chem. A*, 2015, 3(20): 10693-10697.
6. Kumar T N, Chandrasekaran N, Phani K L. Structural and electronic modification of MoS<sub>2</sub> nanosheets using S-doped carbon for efficient electrocatalysis of the hydrogen evolution reaction. *Chem. Commun.*, 2015, 51(24): 5052-5055.
7. Ma C B, Qi X, Chen B, et al. MoS<sub>2</sub> nanoflower-decorated reduced graphene oxide paper for high-performance hydrogen evolution reaction. *Nanoscale*, 2014, 6(11): 5624-5629.

8. Xiao P, Sk M A, Thia L, et al. Molybdenum phosphide as an efficient electrocatalyst for the hydrogen evolution reaction. *Energy Environ. Sci.*, 2014, 7(8): 2624-2629.
9. Chen X, Wang D, Wang Z, et al. Molybdenum phosphide: a new highly efficient catalyst for the electrochemical hydrogen evolution reaction. *Chem. Commun.*, 2014, 50(79): 11683-11685.
10. Kibsgaard J, Jaramillo T F. Molybdenum Phosphosulfide: An Active, Acid - Stable, Earth - Abundant Catalyst for the Hydrogen Evolution Reaction. *Angew. Chem. Int. Ed.*, 2014, 53(52): 14433-14437.
11. Xing Z, Liu Q, Asiri A M, et al. Closely interconnected network of molybdenum phosphide nanoparticles: a highly efficient electrocatalyst for generating hydrogen from water. *Adv. Mater.*, 2014, 26(32): 5702-5707.
12. Cui W, Liu Q, Xing Z, et al. MoP nanosheets supported on biomass-derived carbon flake: One-step facile preparation and application as a novel high-active electrocatalyst toward hydrogen evolution reaction. *Appl. Catal. B: Environ.*, 2015, 164: 144-150.
13. McEnaney J M, Crompton J C, Callejas J F, et al. Amorphous molybdenum phosphide nanoparticles for electrocatalytic hydrogen evolution. *Chem. Mater.*, 2014, 26(16): 4826-4831.
